# Supplementary material
Source: PubMed Central journal article supplement (PMC7475022)
Supplement: NIHMS1620991-supplement-Supp_Figure_10.pdf [file NIHMS1620991-supplement-Supp_Figure_10.pdf]

# Figure S10

| STR markers | D3S1358 | vWA    | D8S1179 | D21S11 | D18S51 | FGA | D5S818 | D13S317 | D7S820 | Amelogenin |
|-------------|---------|--------|---------|--------|--------|-----|--------|---------|--------|------------|
| RO82-W-1    | 14, 15  | 16, 19 | 11, 16  | 29     | 13     | 23  | 12     | 9       | 8, 12  | X          |
