# Supplementary material
Source: PubMed Central journal article supplement (PMC7475022)

Figure S1

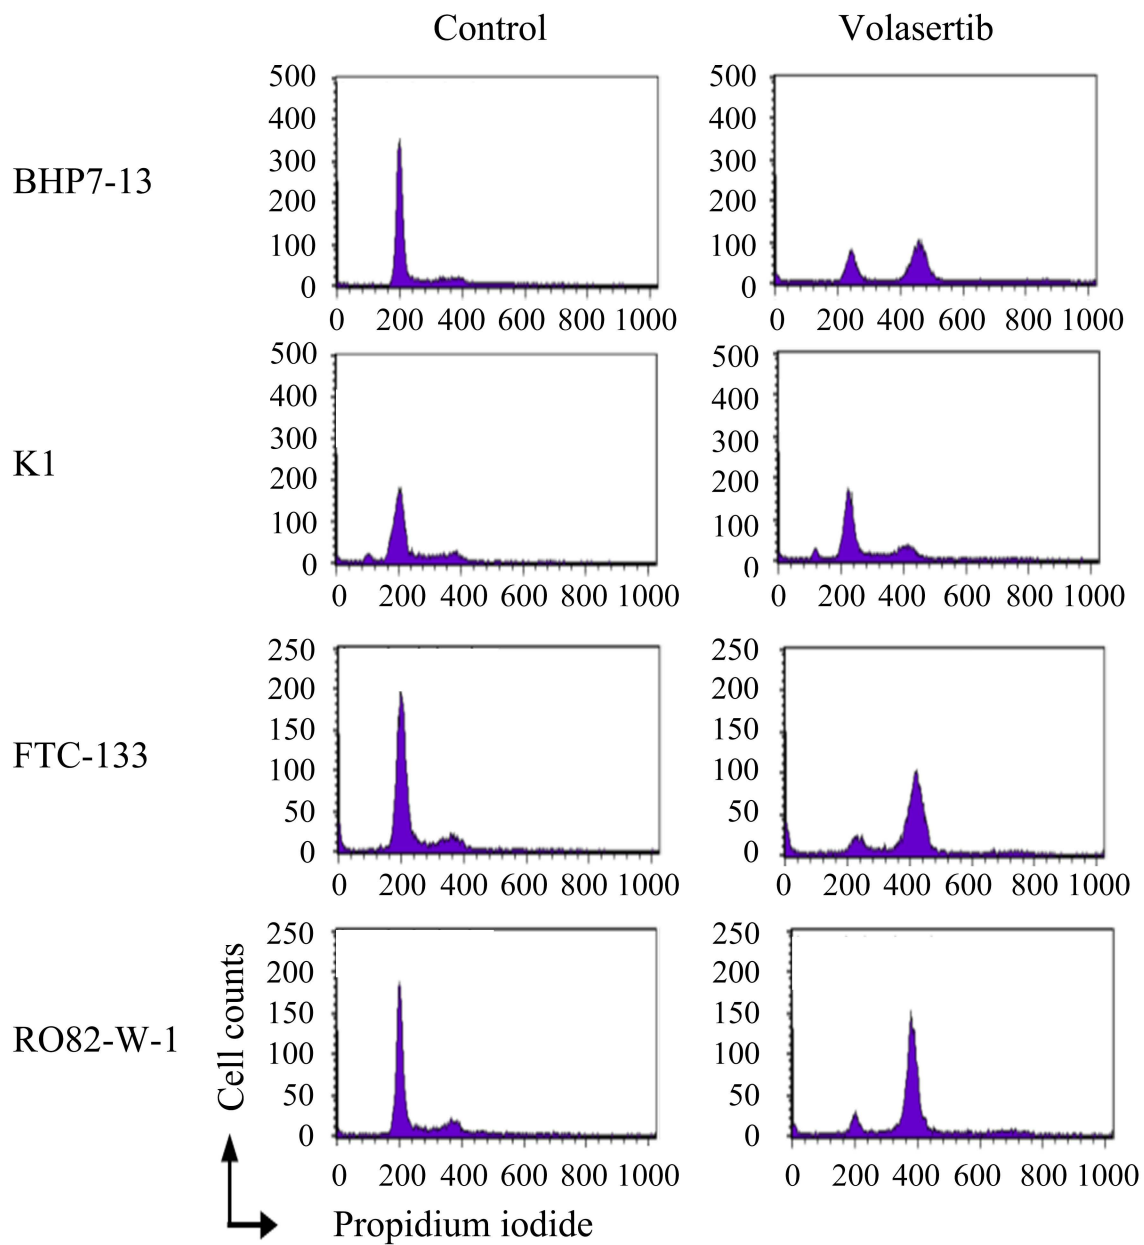

Supplement: NIHMS1620991-supplement-Supp_Figure_01.pdf [file NIHMS1620991-supplement-Supp_Figure_01.pdf]

Figure S2

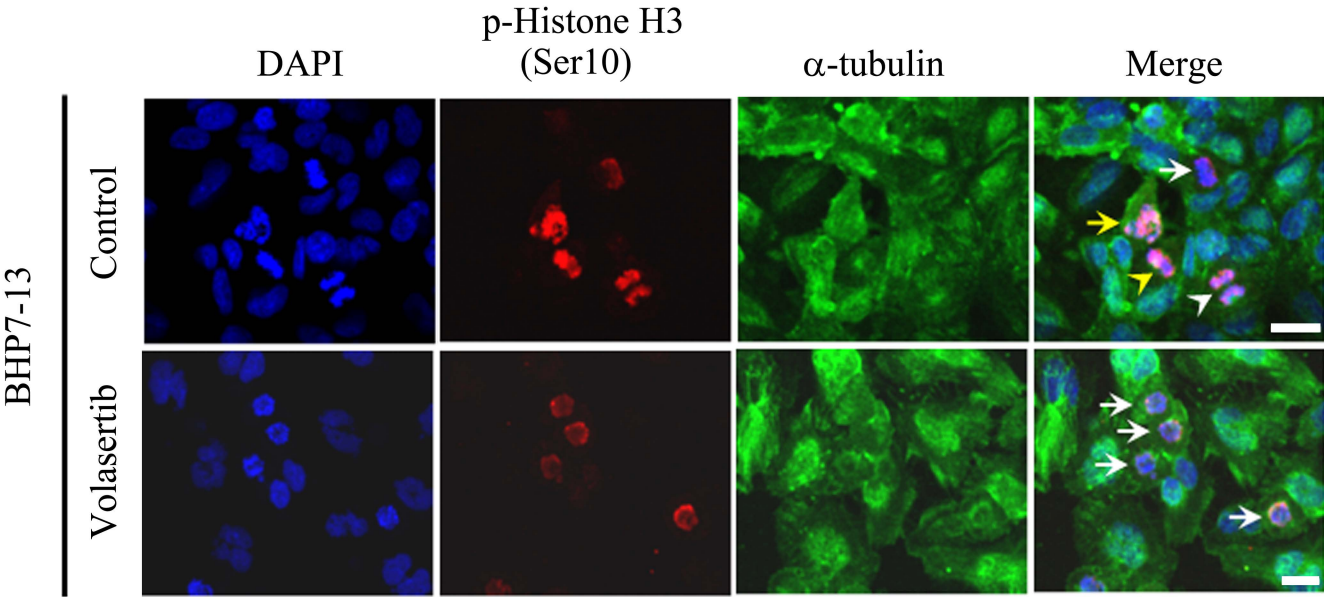

Supplement: NIHMS1620991-supplement-Supp_Figure_02.pdf [file NIHMS1620991-supplement-Supp_Figure_02.pdf]

Figure S3

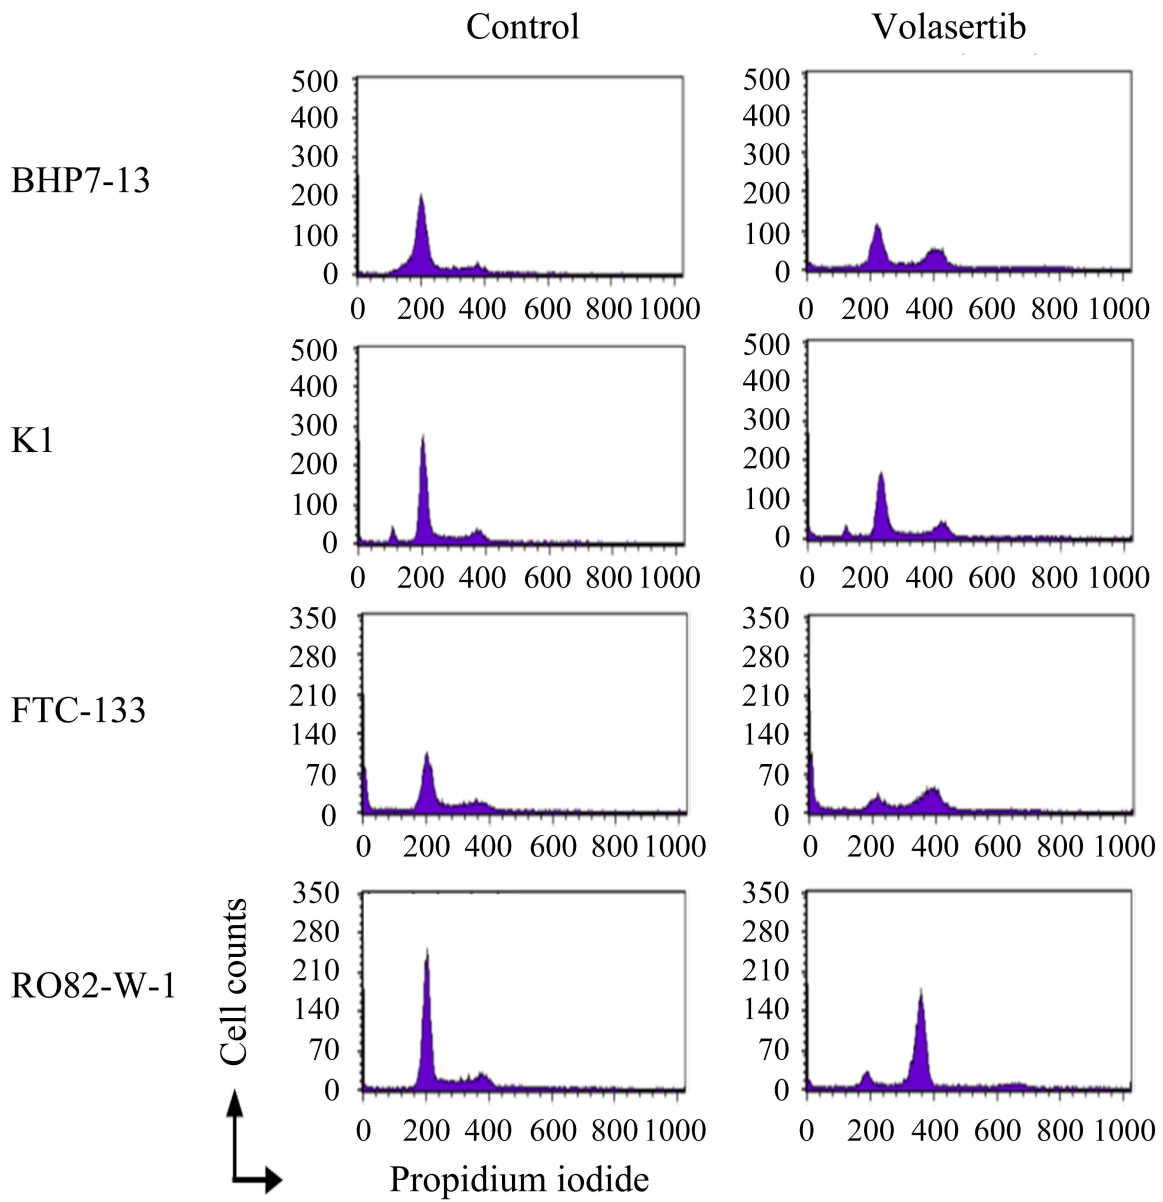

Supplement: NIHMS1620991-supplement-Supp_Figure_03.pdf [file NIHMS1620991-supplement-Supp_Figure_03.pdf]

Figure S4

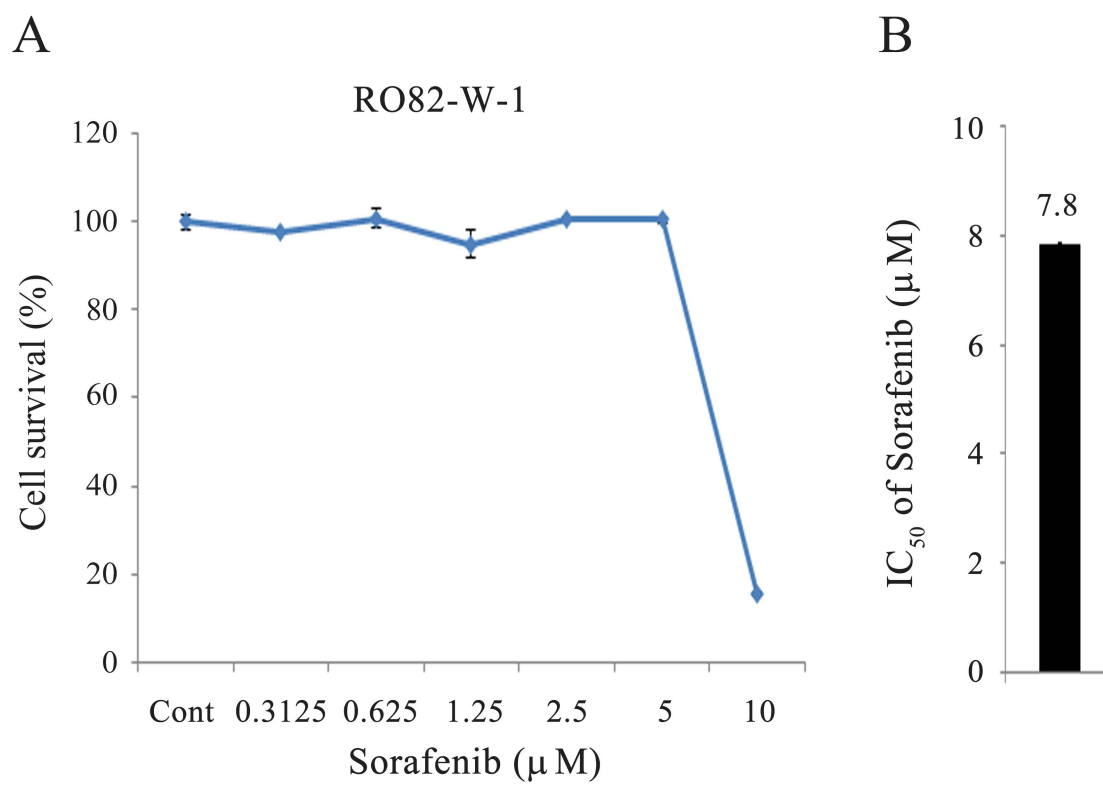

Supplement: NIHMS1620991-supplement-Supp_Figure_04.pdf [file NIHMS1620991-supplement-Supp_Figure_04.pdf]

Figure S6

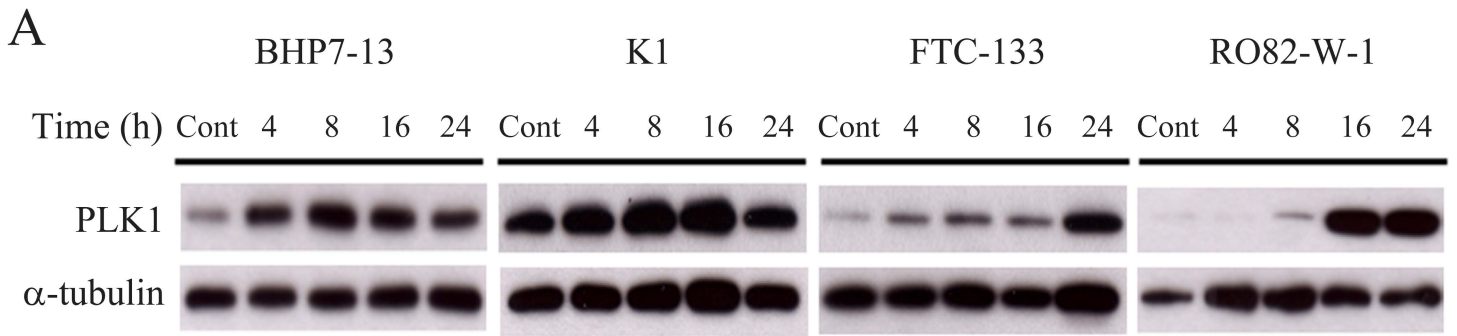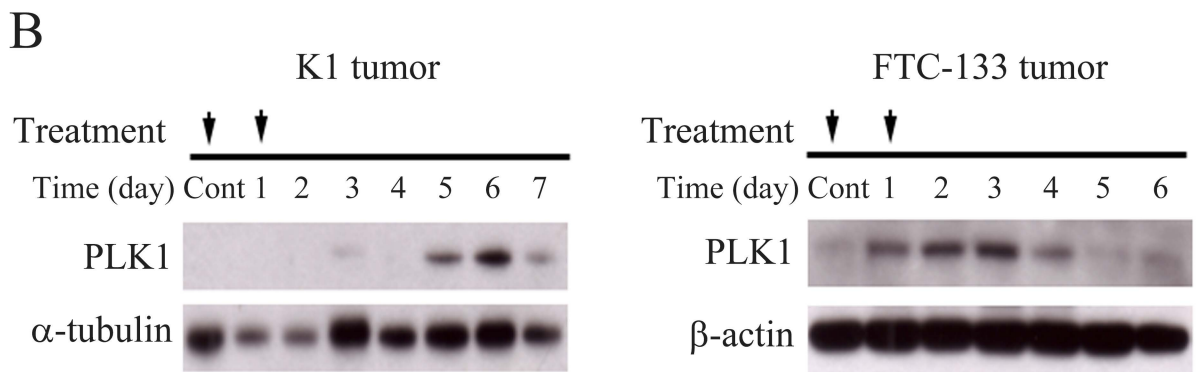

Supplement: NIHMS1620991-supplement-Supp_Figure_06.pdf [file NIHMS1620991-supplement-Supp_Figure_06.pdf]

Figure S7

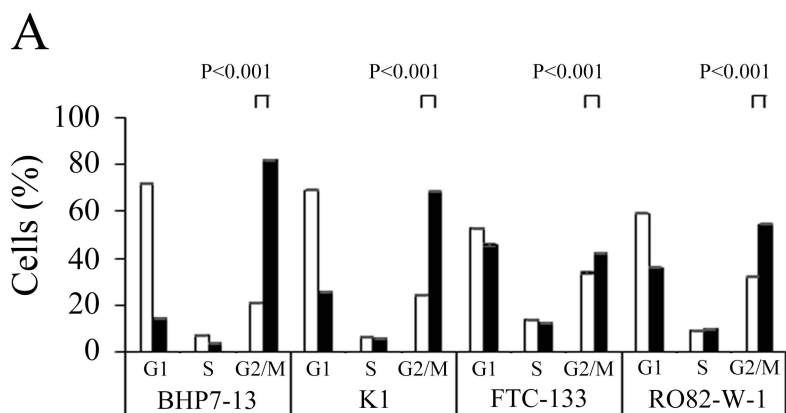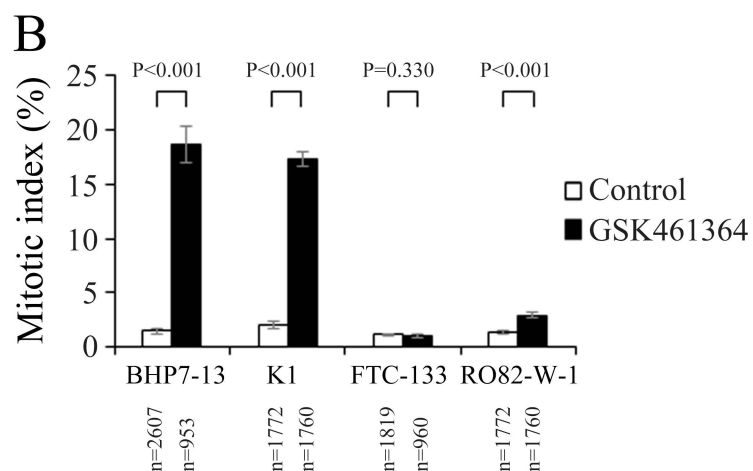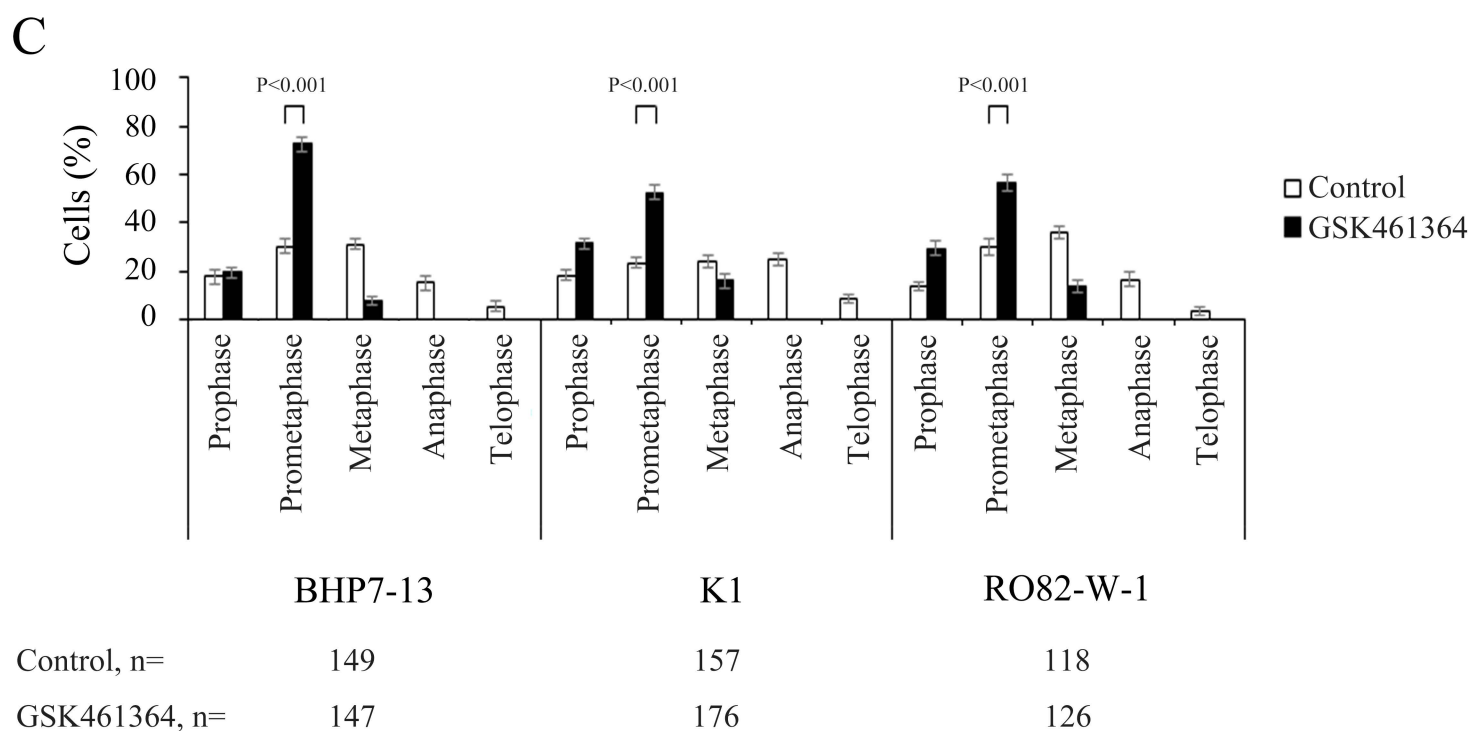

Supplement: NIHMS1620991-supplement-Supp_Figure_07.pdf [file NIHMS1620991-supplement-Supp_Figure_07.pdf]

Figure S8

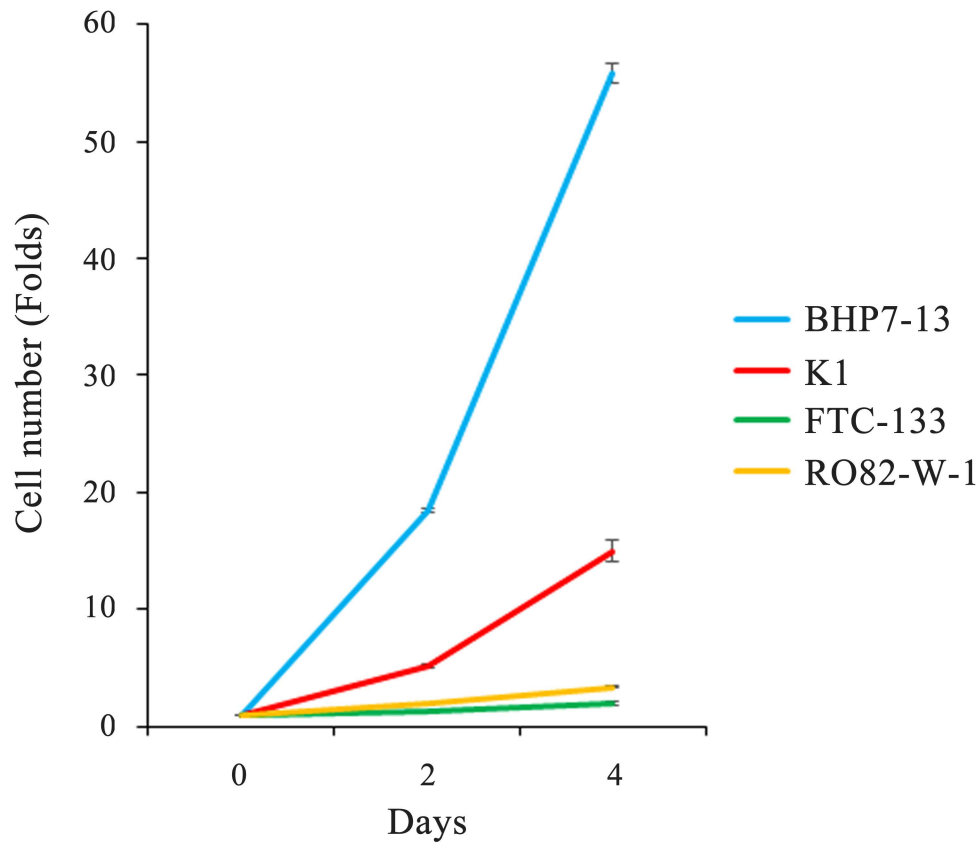

Supplement: NIHMS1620991-supplement-Supp_Figure_08.pdf [file NIHMS1620991-supplement-Supp_Figure_08.pdf]

Figure S9

A

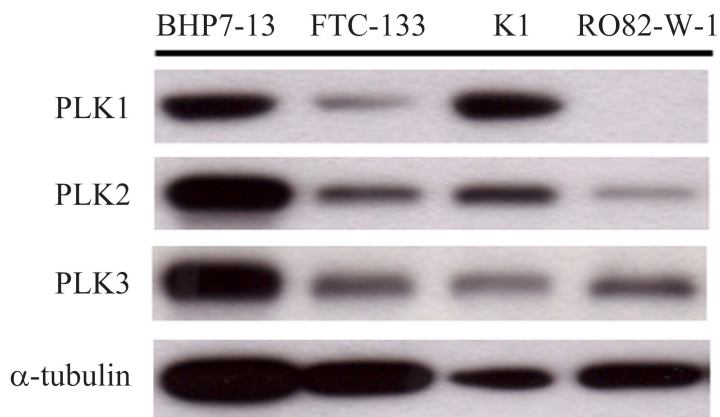

B

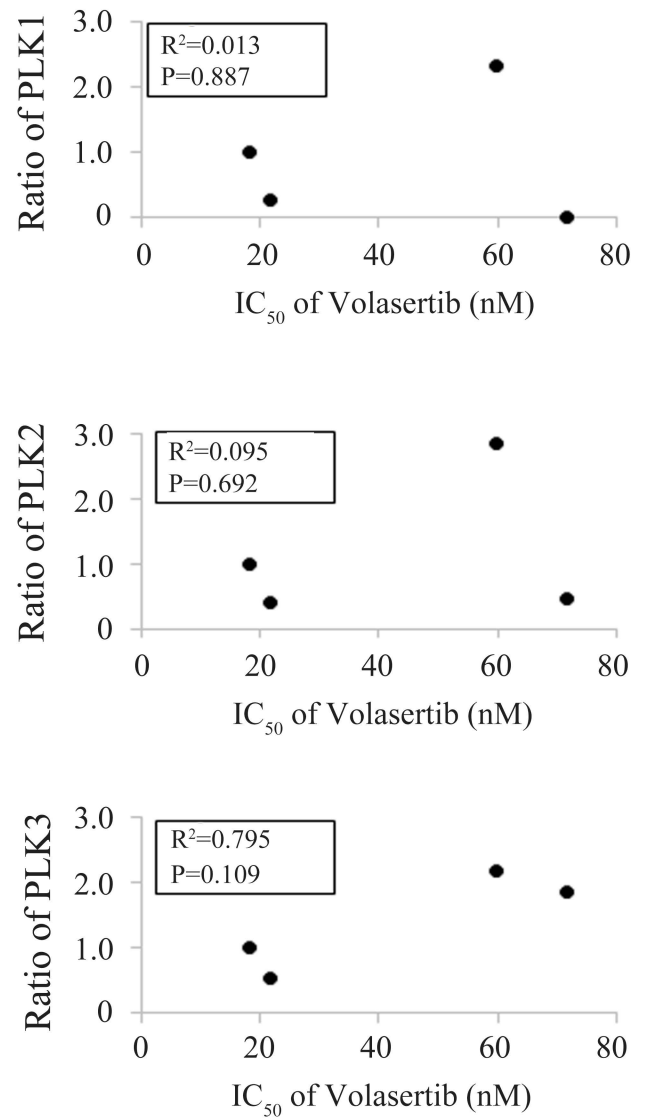

Supplement: NIHMS1620991-supplement-Supp_Figure_09.pdf [file NIHMS1620991-supplement-Supp_Figure_09.pdf]
